# Supplementary material
Source: publisher site journal article supplement (https://www.dovepress.com/get_supplementary_file.php?f=286527.docx)
Supplement: Supplementary file 1 [file get_supplementary_file.php]

**Sensitive Detection of Therapeutic Efficacy with the ETDRS Diabetic Retinopathy Severity Scale**

Jiameng Zhang, MD, PhD,1 Erich C. Strauss, MD1

1Genentech, Inc., South San Francisco, CA

**Supplemental information: RISE and RIDE study sites with ethical approvals in place**

RISE and RIDE

Retina Consultants of Houston, Houston, TX; Georgia Retina PC, Decatur, GA; East Bay Retina Consultants, Oakland, CA; Retina Care Specialists, Palm Beach Gardens, FL; Center for Retina & Macular Disease, Winter Haven, FL;

RISE

BH Regional Eye Institute, Rapid City, SD; Retina Consultants of Charleston, Charleston, SC; Tennessee Retina PC, Nashville, TN; Retina Center of Hawaii, LLC, Honolulu, HI; Retina Research Center, Austin, TX; Eye Care Associates of East Texas, Tyler, TX; W Carolina Retina Associates, Asheville, NC; Retina Vitreous Consultants of New Jersey, Englewood, NJ; South Texas Retinal Consultants, Corpus Christi, TX; University of Missouri, Kansas City, MO; Sarasota Retina Institute, Sarasota, FL; Eye Associates of New Mexico, Albuquerque, NM; Palmetto Retina Center, West Columbia, SC; Retina Consultants PA, Fort Worth, TX; Retinal Diagnostic Center, Campbell, CA; Retinal Consultants of South California, Westlake Village, CA; Retina Consultants of Arizona Ltd., Phoenix, AZ; Retina Associates of New Jersey, Teaneck, NJ; Retinal & Ophthalmic Consultants PC, Northfield, NJ; Vitreous-Retina-Macula Consultants of New York PC, New York, NY; Pacific Eye Associates, San Francisco, CA; Mid-Atlantic Retina, Philadelphia, PA; New York Eye & Ear Infirmary, New York, NY; Retina Associates, New Orleans, LA; Valley Retina Institute, McAllen TX; Colorado Retina Associates PC, Golden, CO; The University of Texas Southwestern Medical Center at Dallas, Dallas, TX; Retina Centers PC, Tucson, AZ; West Coast Retina Medical Group Inc., San Francisco, CA; Massachusetts Eye and Ear Infirmary, Boston, MA; The Retina Center at Pali Momi, Aiea, HI; Retina Vitreous Center, New Brunswick, NJ; Eye Centers of Florida, Fort Meyers, FL; Carolina Eye Associates, Southern Pines, NC; Maine Eye Center, Portland, ME; Wilmer Eye Institute, Johns Hopkins University, Baltimore, MD; University of Colorado Health Sciences Center, Aurora, CO; Retina Vitreous Associates, Toledo, OH; University of California Davis, Sacramento, CA; University of South Florida Eye Institute, Tampa, FL; University of Florida, Gainesville, FL; Retina Consultants of Arizona Ltd., Peoria, AZ; Illinois Retina Associates, Harvey, IL; Scott and White Hospital, Temple, TX; Doheny Eye Institute, Los Angeles, CA; Medical Center Ophthalmology Associates, San Antonio, TX; Cleveland Clinic Foundation, Cleveland, OH; Opthalmic Consultants of Long Island, Lynbrook, NY; Retina Institute of Virginia, Richmond, VA; Retina Consultants of Nevada, Las Vegas, NV; Retina Specialists, Towson, MD; Retina Consultants of San Diego, Poway CA; University of Texas Medical Research, Galveston, TX; Island Retina, Shirley, NY; Eye Surgical Associates, Lincoln, NE; University of Virginia Medical Center, Charlottesville, VA; Hospital Universitario Austral, Buenos Aires, Argentina.

RIDE

The Retina Consultants Slingerlands, NY; Retina-Vitreous Associates Medical Group, Beverly Hills, CA; Southern CA Desert Retina Consultants, Palm Desert, CA; Retina Institute of California, Arcadia, CA; Charles Retina Institution, Memphis, TN; New England Retina Associates, New London, CT; Sarasota Retina Institute, Sarasota, FL; Retina Associates of South Texas, San Antonio,TX; Retina Associates of Western NY, Rochester, NY; Retina Associates, PA, Shawnee Mission, KS; University of New Mexico, Albuquerque, NM; Vision Research Foundation, Royal Oak, MI; Retina Health Center, Fort Myers, FL; Richmond Retinal Associates, Richmond, VA; Connecticut Retina Consultants, Bridgeport, CT; UCSD Jacobs Retina Center, La Jolla, CA; East Florida Eye Institute, Stuart, FL; National Ophthalmic Research, Fort Myers, FL; National Retina Institute, Towson, MD; Associated Retina Consultants, Phoenix, AZ; Vitreoretinal Eye Center, Biloxi, MS; Retina Associates Southwest PC, Tucson, AZ; Delaware Valley Retina Associates, Lawrenceville, NJ; Associates in Ophthalmology, West Mifflin, PA; Fletcher Allen Health Care, Burlington, VT; OSU Eye Physicians & Surgeons, Dublin, OH; Kresge Eye Institute, Detroit, MI; Southeast Retina Center, Augusta, GA; Lahey Clinic/The Eye Institute, Peabody, MA; Ochsner Medical Center, New Orleans, LA; Ophthalmology Associates, Fort Worth, TX; West Texas Retina Consultants PA, Abilene, TX; Retina Consultants Medical Group, Sacramento, CA; PA Retina Specialists PC, Camphill, PA; Wolfe Clinic, West Des Moines, IA; Foresight Studies LLC, San Antonio, TX; Retina Center NW, Silverdale, WA; VMR Institute, Huntington Beach, CA; Retina Associates of Cleveland Inc., Beachwood, OH; Davis Duehr Dean, Madison, WI; Southern Vitreoretinal Associates, Tallahassee, FL; Retina Group of Florida, Fort Lauderdale, FL; New England Retina Associates, Hamden, CT; Retina Specialists, Desoto, TX; Allegheny Ophthalmic, Pittsburgh, PA; Retina Associates, New York, NY; Vitreo-Retinal Consultants, Wichita, KS; Vitreoretinal Associates, Seattle, WA; North California Retina Vitreous Associates, Mountain View, CA; IOPA, Santiago, Chile; Miguel Guzman Assoc., Lima, Peru; Vision Oftalmologica, Tucutian, Argentina; Organizacion Medica de Investigaction, Buenos Aires, Argentina; Oftalmos, Buenos Aires, Argentina; F. Caride Assoc, Buenos Aires, Argentina; Fundaction Oftalmologica Nacional, Bogota, Colombia.
